# Supplementary material for: A novel k-mer mixture logistic regression for methylation susceptibility modeling of CpG dinucleotides in human gene promoters
Source: PubMed Central journal article supplement (PMC3311103; doi:10.1186/1471-2105-13-s3-s15), 2012-03-21
Supplement: 1471-2105-13-S3-S15-S1.pdf [file 1471-2105-13-S3-S15-S1.pdf]

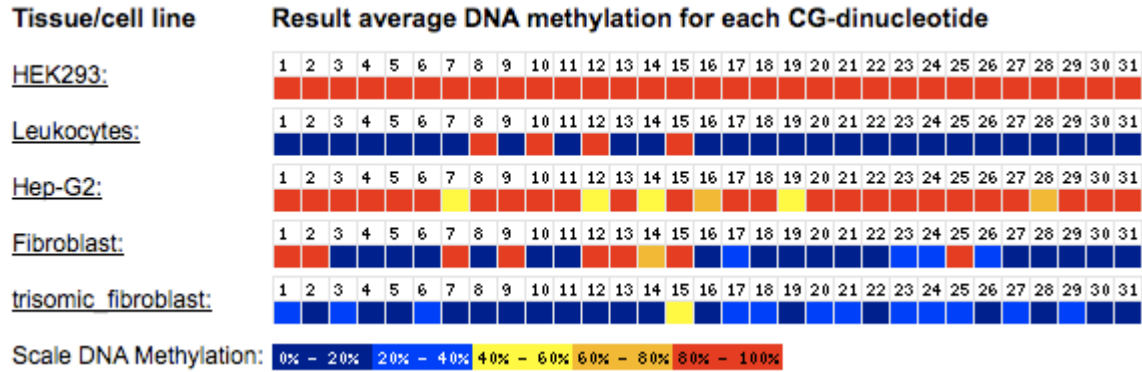

**DNA methylation level variation.**

The figure shows DNA methylation level variation in amplicon 193 from 5 cell types.

The region has 31 CpG sites and methylation levels are widely different among tissues regardless of the same primer region.

The figure was captured from [http://biochem.jacobs-](http://biochem.jacobs-university.de/name21/presentation/amplicon_summaries/193_amplicon_summary.html)

[university.de/name21/presentation/amplicon\\_summaries/193\\_amplicon\\_summary.html](http://biochem.jacobs-university.de/name21/presentation/amplicon_summaries/193_amplicon_summary.html).
