# Supplementary material for: A novel k-mer mixture logistic regression for methylation susceptibility modeling of CpG dinucleotides in human gene promoters
Source: PubMed Central journal article supplement (PMC3311103; doi:10.1186/1471-2105-13-s3-s15), 2012-03-21
Supplement: 1471-2105-13-S3-S15-S2.pdf [file 1471-2105-13-S3-S15-S2.pdf]

# 1 CpG site-specific modeling

In this setting, the DNA methylation susceptibility modeling is performed at the CpG site level. The method used to calculate the methylation level at each CpG site is illustrated in Figure 1.

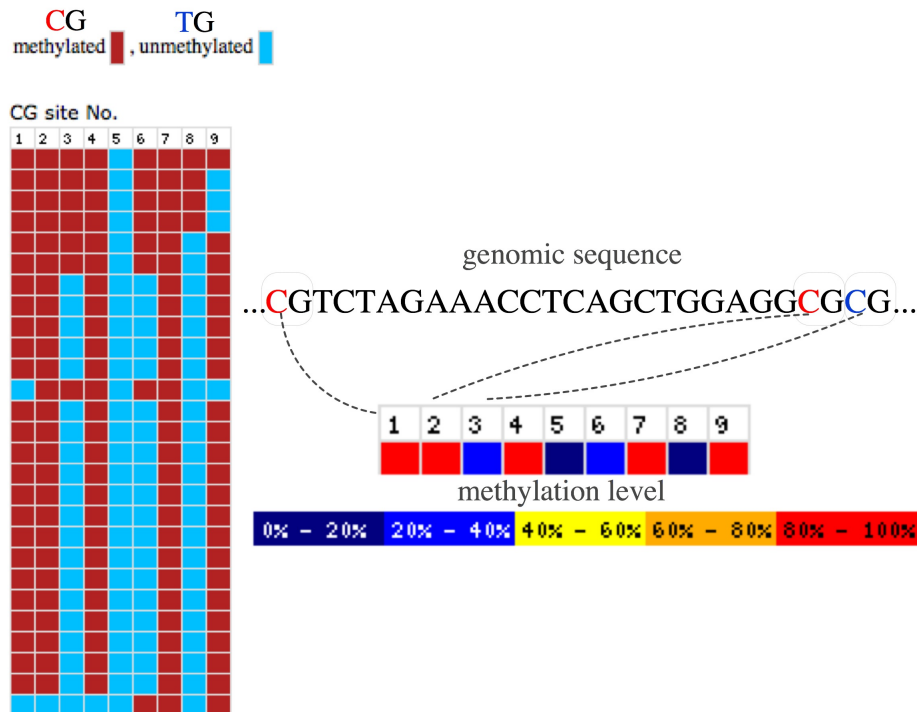

Figure 1: Illustration of CpG site specific methylation level. The 5-level methylation status scheme is categorized by [1]. CpG sites with DNA methylation status in the gray area (between 40% and 60%) were not considered, as suggested by [1]. The methylation status was then labeled as one of two categories, a methylation susceptible class (>60%) and a methylation resistant class (<40%).

**Labeling data:** The methylation level  $\mathbf{p}$  was measured as a probability where  $p_j = \#CGs / (\#CGs + \#TGs)$  at each CpG site  $s_j$ . Then, a label  $t_j$  was assigned for  $s_j$  as either + or - depending on its methylation level. A + label was given to  $t_j$  where  $p_j > 0.6$  and a - label was assigned to  $t_j$  where  $p_j < 0.4$ . Any CpG site whose DNA methylation level is in gray area (between 0.4 and 0.6) was not used, as suggested by [1].

**Attributes for modeling:** K-mers within length  $w$  (50 by default) base pairs centered at  $s_j$  were extracted from the reference human genome sequence (*hg18*).

**Modeling:** Modeling DNA methylation susceptible CpG sites  $\{s_j\}$  was carried out by logistic regression using attributes  $\mathbf{x}$  and target  $\mathbf{t}$ . We built a model per each tissue type and computed a logistic model by minimizing the error between predicted and observed methylation status.

## 2 Promoter region modeling

**Labeling data:** The methylation level of a promoter region  $PR_k$  was defined as an aggregation of all CpG sites  $\{s_j\}$  within  $PR_k$ . The methylation status of each site was labeled as either + or - as we did for the site-specific modeling. Then, the methylation probability  $p_k$  of  $PR_k$  was defined as a ratio of the number of CpG sites in  $PR_k$  to the number of CpG sites with the + label. The label  $t_k$  of  $PR_k$  was then assigned + if  $p_k$  is greater than 0.5. Otherwise, a label - is assigned to  $t_k$ .

**Attributes for modeling:** K-mer occurrences in promoter regions were used as attributes. For each  $PR_k$ , we extracted a region of sequence from reference sequence (*hg18*). K-mer pattern occurrences in the methylation susceptible and not susceptible promoters were used to select a small subset of k-mers features  $\mathbf{x}$ .

**Modeling:** Given a set of k-mer patterns, a single logistic model was used to model the methylation status of all promoters, using attributes  $\mathbf{x}$  and labels  $\mathbf{t}$ .

## References

- [1] Y. Zhang, et. al. "Dna methylation analysis of chromosome 21 gene promoters at single base pair and single allele resolution," *PLoS Genet*, vol. 5, no. 3, pp. e1000438+, 2009.
